# Supplementary material for: Nuclear factor (erythroid derived 2)-like 2 activation increases exercise endurance capacity via redox modulation in skeletal muscles
Source: PubMed Central journal article supplement (PMC5635018; doi:10.1038/s41598-017-12926-y), 2017-10-10
Supplement: 41598_2017_12926_MOESM1_ESM.pdf [file 41598_2017_12926_MOESM1_ESM.pdf]

## *Supplementary information*

### **Nuclear factor (erythroid derived 2)-like 2 activation increases exercise endurance capacity via redox modulation in skeletal muscles**

Sechang Oh<sup>1,2,5,+</sup>, Shoichi Komine<sup>2,+</sup>, Eiji Warabi<sup>2</sup>, Kentaro Akiyama<sup>2,5</sup>, Akiko Ishii<sup>2</sup>, Kazunori Ishige<sup>2</sup>, Yuji Mizokami<sup>2</sup>, Keisuke Kuga<sup>2</sup>, Masaki Horie<sup>2</sup>, Yoshihiro Miwa<sup>2</sup>, Takao Iwawaki<sup>3</sup>, Masayuki Yamamoto<sup>4</sup>, and Junichi Shoda<sup>1,2,\*</sup>

<sup>1</sup>The Center of Sports Medicine and Health Sciences, Tsukuba University Hospital, Tsukuba, Ibaraki 305-8576, Japan;

<sup>2</sup>Faculty of Medicine, University of Tsukuba, Tsukuba, Ibaraki 305-8575, Japan;

<sup>3</sup>Department of Life Science, Medical Research Institute, Kanazawa Medical University, Uchinada, Kahoku, Ishikawa 920-0293, Japan;

<sup>4</sup>Department of Medical Biochemistry, Tohoku University Graduate School of Medicine, Sendai, Miyagi 980-8575, Japan;

<sup>5</sup>Japan Society for the Promotion of Science, Tokyo 102-0083, Japan

<sup>+</sup>These authors contributed equally to this work.

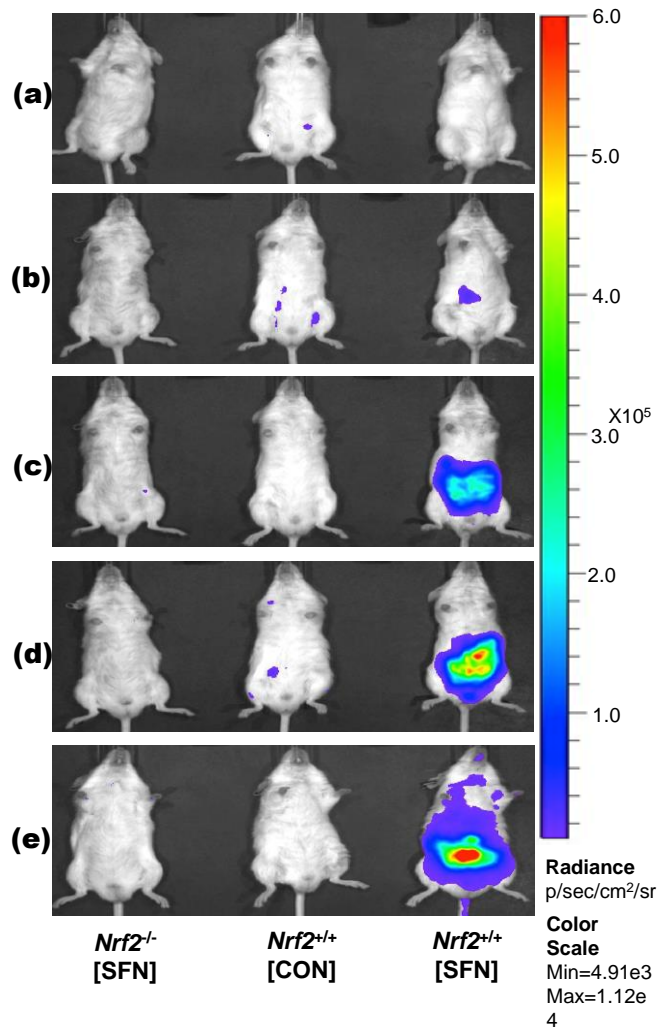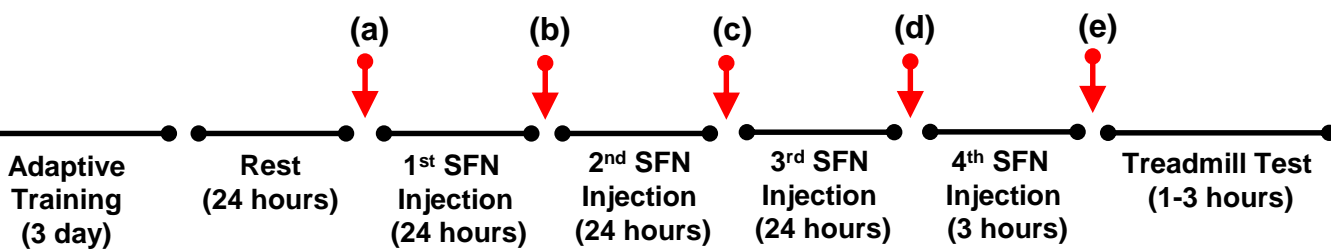

## Supplementary figure S1.

Fig. S1. SFN-induced *Nrf2*-Luc activity detected using an In Vivo Imaging System and the results of genotyping in *Nrf2* and OKD48 transgenic mice in the supine position. Time course of the Luciferase assay is shown (a) ~ (e)

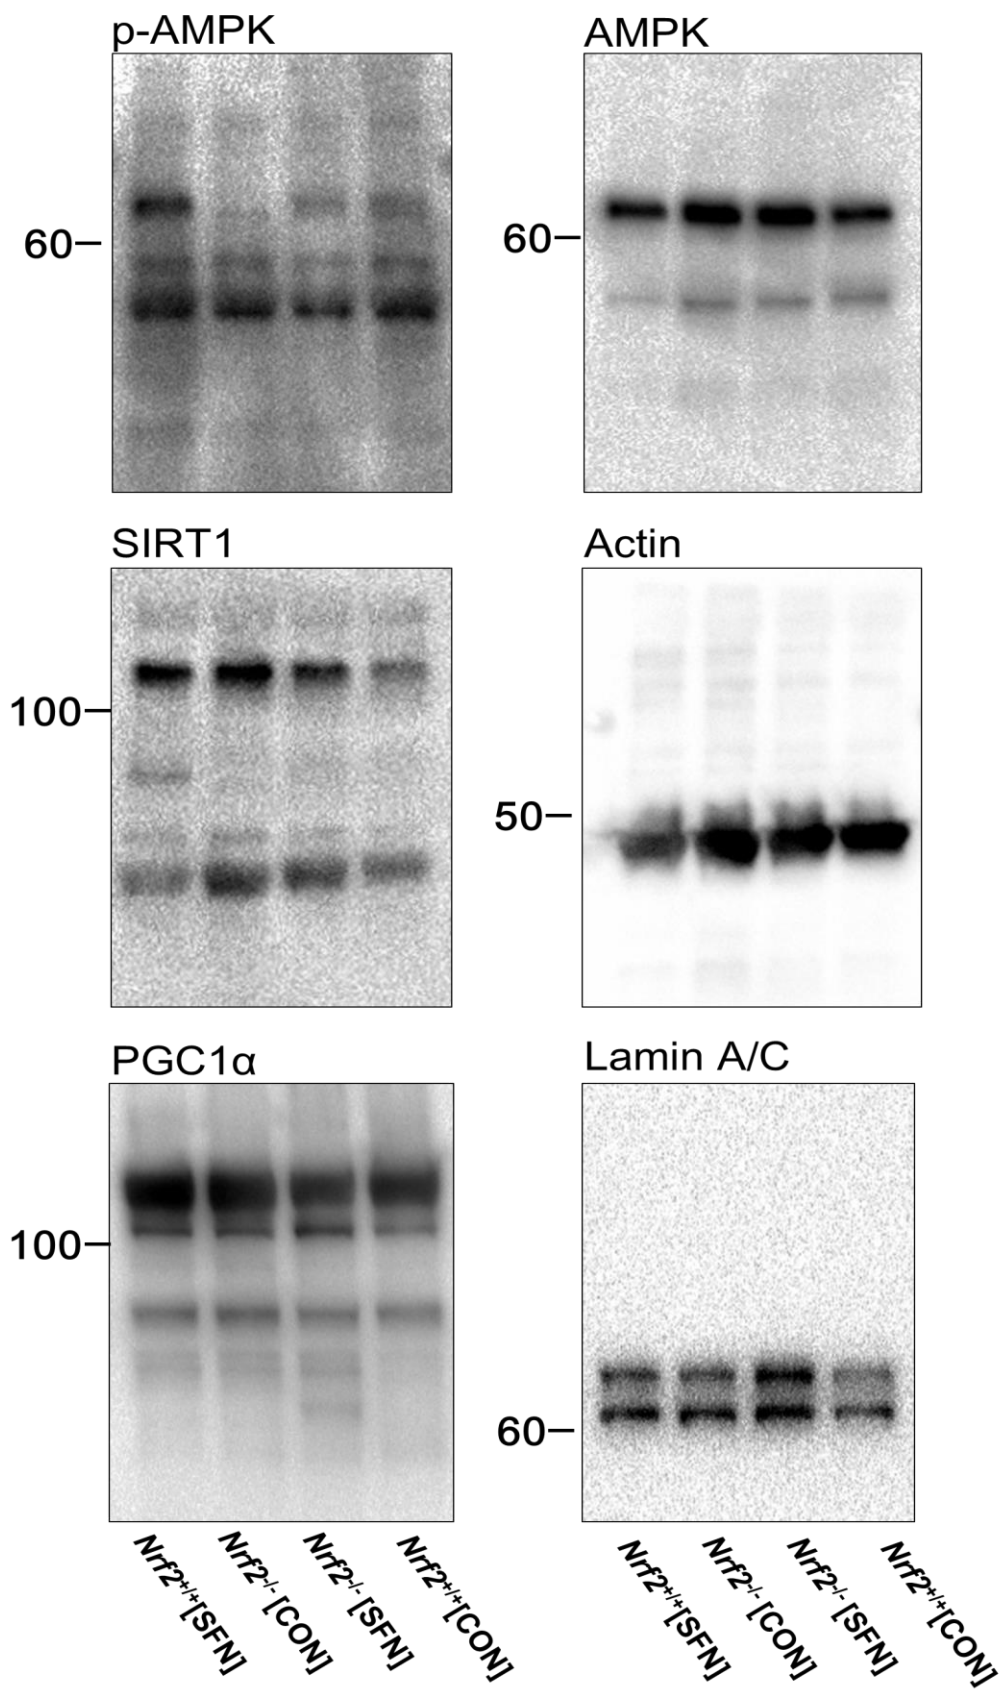

### Supplementary figure S2. Full-length image of figure 3 (A)

The origin of these panels is identical with figure 3 (A) showing western blotting with phosphor-AMPK, AMPK, SIRT1, Actin, PGC1α, and Lamin A/C antibody
